# Supplementary material
Source: Research Square preprint supplement (doi:10.21203/rs.3.rs-9236379/v1)
Supplement: Supplementary file 2 [file dffa62bd929f52a2566def43.docx]

**SUPPLEMENTARY INFORMATION**

**Organoid medium**

| Medium component | Volume |
| --- | --- |
| Advanced DMEM/F12 | 80 ml |
| Glutamax 100x | 1ml |
| Hepes 100x | 1ml |
| Penicillin/Streptomycin 100x | 1ml |
| R-spondin conditioned medium | 10 ml |
| Noggin conditioned medium | 10 ml |
| B27 supplement without vitamin A 50x | 2 ml |
| N2 supplement 100x | 1 ml |
| n-Acetyl Cysteine | 250 µl |
| Nicotinamide | 1 ml |
| EGF | 100 µl |
| FGF2 | 10 µl |
| FGF7 | 50 µl |
| FGF10 | 40 µl |
| Neuregulin 1 | 200 µl |
| Insulin Humanolog | 500 µl |
| Hydrocortisone | 50 µl |
| Heparin | 8 µl |
| A83-01 | 10 µl |
| SB202190 | 10 µl |
| Primocin 500x | 200 µl |
| Forskolin 2400 x | 10 µM |
| LY27632 | 10 µM |

**ScType annotation table**

| Cell type | Positive marker genes |
| --- | --- |
| LASP | EPCAM,CDH1,CD17,KIT,ALDH1A3,SLPI |
| LHS | EPCAM,CDH1,CD17,AREG,ANKRD30A,FOXA1 |
| BMYO | EPCAM,CDH1,CD17,ACTG2,ACTA2,TAGLN |
| FB | DCN,LUM |
| PV | PDGFRB,NOTCH3,MYH11 |
| VE | PLVAP,PECAM1,CLDN5 |
| LE | MMRN1,PDPN,CCL21 |
| T CD4 | PTPRC,CXCR4,CD3D,CD3G,CD4,CCR4 |
| T CD8 | PTPRC,CXCR4,CD3D,CD3G,CD8A,CD8B |
| NK | PTPRC,CXCR4,GZMH,GZMB,KLRC3,XCL2 |
| B cell | PTPRC,CXCR4,MS4A1,CD79A |
| Plasma cell | IGKC,JCHAIN |
| Macrophage | PTPRC,CXCR4,FCER1G,C1QB |
| Dendritic cell | PTPRC,CXCR4,CPVL,ID2 |

**Epigenetics screening library concentrations**

| Drug | Concentration (µM) |
| --- | --- |
| Sulforaphane | 5 |
| UNC669 | 5 |
| SB939 | 0.5 |
| PCI 34051 | 5 |
| L-a-Hydroxyglutaric Acid (sodium salt) | 5 |
| Sirtinol | 5 |
| 5-Nitroso-8-quinolinol | 1 |
| C646 | 5 |
| JNJ-26481585 | 0.005 |
| Garcinol | 5 |
| Plumbagin | 5 |
| Scriptaid | 5 |
| Suberohydroxamic Acid | 5 |
| Apicidin | 0.05 |
| LMK 235 | 2.5 |
| UNC0321 (trifluoroacetate salt) | 5 |
| HDAC6 Inhibitor | 5 |
| Cl-Amidine (hydrochloride) | 5 |
| SP2509 | 5 |
| JGB1741 | 5 |
| A-366 | 5 |
| I-BET762 | 5 |
| UNC0638 | 5 |
| OICR-9429 | 5 |
| EPZ004777 (formate) | 5 |
| EPZ6438 | 5 |
| PBIT | 5 |
| Zebularine | 5 |
| Delphinidin (chloride) | 5 |
| ITF 2357 | 0.5 |
| Octyl-a-hydroxyglutarate | 5 |
| UNC0379 | 5 |
| Methylstat (hydrate) | 5 |
| BVT 948 | 5 |
| BG45 | 5 |
| UMB-32 | 5 |
| 2,4-Pyridinedicarboxylic Acid (hydrate) | 5 |
| PFI-1 | 5 |
| 5-Azacytidine | 5 |
| SGI-1027 | 5 |
| Decitabine | 5 |
| I-BET151 | 5 |
| (+)-JQ1 | 5 |
| EPZ015666 | 5 |
| BI-2536 | 0.025 |
| BAZ2-ICR | 5 |
| Sodium 4-Phenylbutyrate | 5 |
| OG-L002 | 5 |
| IOX1 | 5 |
| MI-2 (hydrochloride) | 5 |
| ML-324 | 5 |
| Gemcitabine | 0.1 |
| GSK484 (hydrochloride) | 5 |
| Resminostat (hydrochloride) | 5 |
| NI-57 | 5 |
| Daminozide | 5 |
| GSK-J1 (sodium salt) | 5 |
| PFI-4 | 5 |
| GSK-J4 (hydrochloride) | 2.5 |
| Tasquinimod | 5 |
| CI-994 | 5 |
| CPTH2 (hydrochloride) | 5 |
| MM-102 | 5 |
| TC-E 5003 | 1 |
| Butyrolactone 3 | 5 |
| L002 | 1 |
| Tenovin-1 | 0.025 |
| Tenovin-6 | 0.25 |
| BI-9564 | 5 |
| RN-1 (hydrochloride) | 5 |
| Anacardic Acid | 5 |
| AGK2 | 5 |
| CAY10603 | 1 |
| Splitomicin | 5 |
| CBHA | 2 |
| Mocetinostat | 0.5 |
| Oxamflatin | 0.25 |
| Salermide | 5 |
| A-196 | 5 |
| MS049 (hydrochloride) | 5 |
| GSK591 | 5 |
| Panobinostat | 0.005 |
| MS-275 | 0.025 |
| MS023 (hydrochloride) | 5 |
| RG-108 | 5 |
| 2’,3’,5’-triacetyl-5-Azacytidine | 5 |
| PRT4165 | 5 |
| UNC0224 | 5 |
| ORY-1001 | 5 |
| EPZ020411 | 5 |
| 3-Deazaneplanocin A | 5 |
| Sinefungin | 5 |
| Pyroxamide | 5 |
| N-Oxalylglycine | 5 |
| GSK2879552 | 5 |
| AMI-1 (sodium salt) | 5 |
| EPZ005687 | 5 |
| SGC0946 | 5 |
| UNC1215 | 5 |
| Cyproheptadine (hydrochloride hydrate) | 5 |
| GSK343 | 5 |
| Bromosporine | 5 |
| GSK2801 | 5 |
| SIRT1/2 Inhibitor IV | 5 |
| I-CBP112 (hydrochloride) | 5 |
| SGC-CBP30 | 5 |
| UNC0642 | 5 |
| AZD 5153 | 2.5 |
| (R)-PFI-2 (hydrochloride) | 5 |
| HPOB | 5 |
| CPTH6 (hydrobromide) | 5 |
| PFI-3 | 5 |
| JIB-04 | 0.025 |
| CAY10683 | 5 |
| GSK126 | 5 |
| CPI-203 | 5 |
| 6-Thioguanine | 5 |
| HAT Inhibitor II | 5 |
| CeMMEC1 | 5 |
| OTX015 | 0.5 |
| PCI 24781 | 0.25 |
| BML-278 | 5 |
| CeMMEC13 | 5 |
| EPZ5676 | 5 |
| MC 1568 | 5 |
| 4’-bromo-Resveratrol | 5 |
| ?-Hydroxyglutaric Acid (sodium salt) | 5 |
| S-(5’-Adenosyl)-L-methionine (tosylate) | 5 |
| RVX-208 | 5 |
| Todralazine (hydrochloride) | 5 |
| LAQ824 | 0.025 |
| HDAC3 Inhibitor | 5 |
| GSK-LSD1 (hydrochloride) | 5 |
| CXD101 | 5 |
| RGFP966 | 5 |
| BRD73954 | 5 |
| NCH-51 | 1 |
| UF010 | 5 |
| RGFP109 | 5 |
| Trichostatin A | 0.1 |
| CAY10398 | 5 |
| RSC-133 | 5 |
| BML-210 | 5 |
| C-7280948 | 5 |
| CAY10591 | 5 |
| EED226 | 5 |
| SAHA | 1 |
| Tranylcypromine (hydrochloride) | 5 |
| CAY10722 | 5 |
| PAOA | 5 |
| TMP-195 | 5 |
| Bufexamac | 5 |
